# Supplementary material for: A binuclear Zn(ii)–Zn(ii) complex from a 2-hydroxybenzohydrazide-derived Schiff base for selective detection of pyrophosphate
Source: Royal Society of Chemistry journal article supplement (doi:10.1039/c4dt01799d), 2014-07-29

## Supporting Information for

### Binuclear Zn(II)–Zn(II) Complex from a 2-Hydroxybenzohydrazide-Derived Schiff Base for Selective Detection of Pyrophosphate Anion

Junfeng Wang,<sup>a</sup> Bin Liu,<sup>a</sup> Xiumin Liu,<sup>a</sup> Chrys Wesdemiotis,<sup>a</sup> Yi Pang<sup>\*a,b</sup>

<sup>a</sup>Department of Chemistry & <sup>b</sup>Maurice Morton Institute of Polymer Science, The University of Akron, Akron, Ohio 44325 U.S.A; E-mail: yp5@uakron.edu

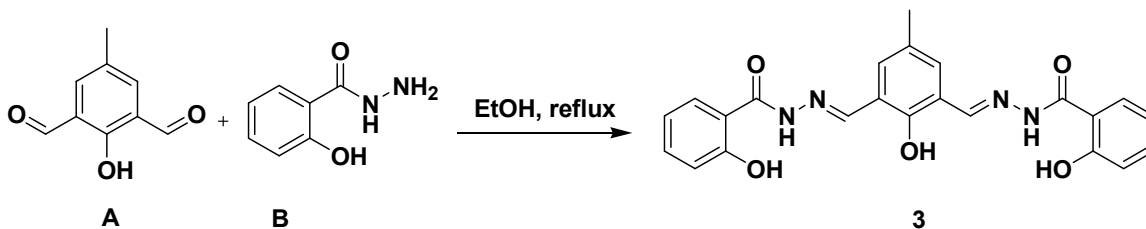

**Synthesis of sensor 3.** Intermediates **A** (80.0 mg)<sup>1</sup> and **B** (150.0 mg, from Acros Organics) were dissolved in EtOH, then the reaction mixture was refluxed for 2 hours. Dye **3** precipitated out as yellow solid and was purified by simple filtration in >90% yield. <sup>1</sup>H NMR (300 MHz, DMSO-*d*<sub>6</sub>): 12.25 (2H, s), 12.05 (2H, br), 11.77 (2H, br), 8.73 (2H, s), 7.89 (2H, d, *J* = 7.5 Hz), 7.57 (2H, s), 7.45 (2H, tri, *J* = 7.2 Hz), 6.98 (2H, d, *J* = 8.7 Hz), 6.94 (2H, d, *J* = 8.4 Hz), 2.32 (3H, s); <sup>1</sup>H NMR (300 MHz, CD<sub>3</sub>OD): 8.70 (2H, s), 7.94 (2H, d, *J* = 7.2 Hz), 7.67 (2H, s), 7.48 (2H, td, *J* = 1.8 Hz, *J* = 8.1 Hz), 7.01 (2H, d, *J* = 7.8 Hz), 6.98 (2H, d, *J* = 8.1 Hz), 2.37 (3H, s); <sup>13</sup>C NMR (75 MHz, DMSO-*d*<sub>6</sub>): 165.2, 159.5, 155.3, 147.4, 134.4, 131.1, 129.0, 128.8, 120.3, 119.4, 117.8, 116.1, 20.4; ESI (m/z): calcd for C<sub>23</sub>H<sub>19</sub>N<sub>4</sub>O<sub>5</sub>, [M-H]<sup>+</sup>, 431.1356, found, 431.1024.

**Preparation for the Zinc complex.** **3** was dissolved in DMSO at 10 mM as the stock solution and Zn(NO<sub>3</sub>)<sub>2</sub> was dissolved in EtOH at 10 mM as the stock solution. 2 μL of **3** and 2 μL of Zn(NO<sub>3</sub>)<sub>2</sub> stock solution were mixed to form the **3**-Zn<sup>2+</sup> zinc complex. 2 μL of **3** and 4 μL of Zn(NO<sub>3</sub>)<sub>2</sub> stock solution were mixed to form the **3**-2Zn<sup>2+</sup> zinc complex, which was diluted to 2mL for UV-vis and fluorescent measurement.

**Spectroscopic Measurements.** NMR spectra were collected on a Varian 300 Gemini spectrometer. Mass spectrometric data were obtained on a HP1100LC/MSD mass spectrometry. HRMS data were performed on an ESI-TOF MS system (Waters, Milford, MA). UV-Vis spectra were acquired on a Hewlett-Packard 8453 diode-array spectrometer. Fluorescence spectra were obtained on a HORIBA Jobin Yvon NanoLog spectrometer.

**Reference:**

1. Q. Chu, D. A. Medvetz, M. J. Panzner, and Y. Pang, *Dalton Trans.*, 2010, **39**, 5254.

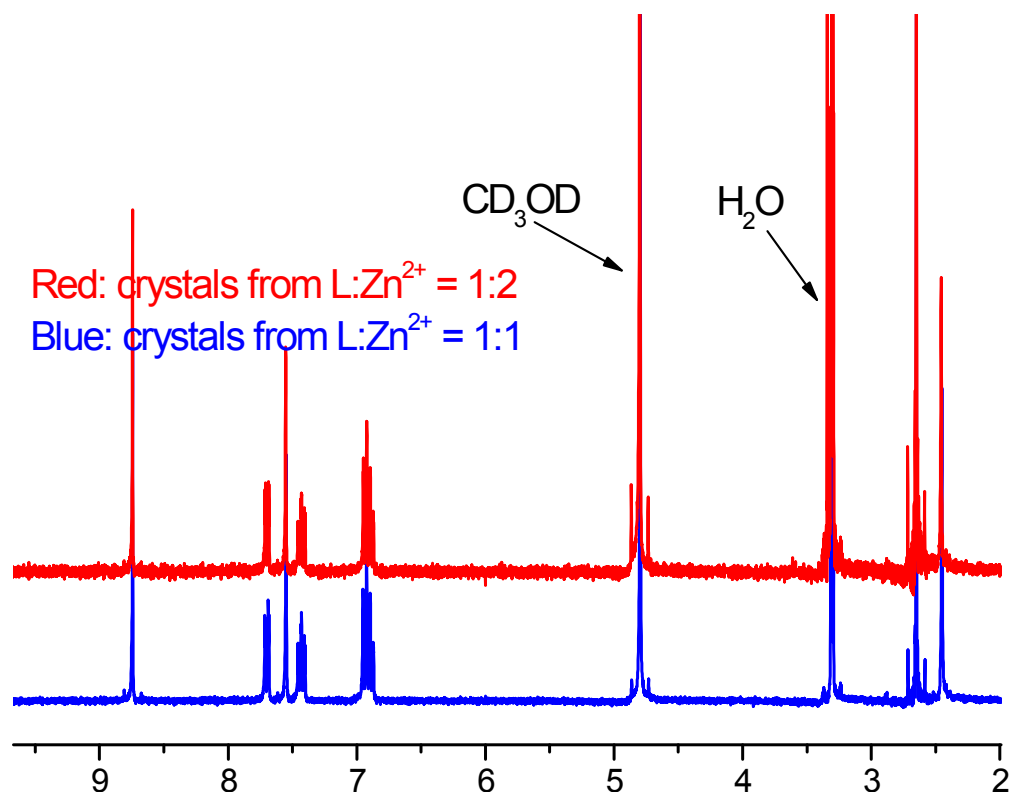

Fig. S1.  $^1\text{H}$  NMR of **3**-Zn crystals **4** in  $\text{CD}_3\text{OD}$ : The crystalline products were obtained by mixing ligand **3** and  $\text{Zn}(\text{NO}_3)_2$  in 1:1 and 1:2 ratio in DMSO/EtOH (5:1 by volume).

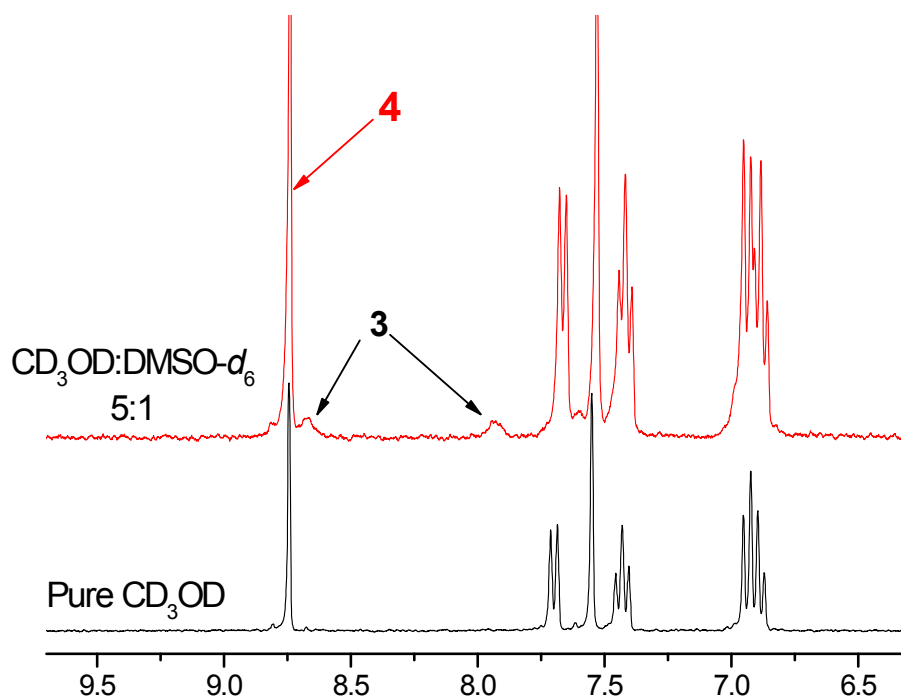

Fig. S2.  $^1\text{H}$  NMR of crystals **4** in  $\text{CD}_3\text{OD}$  and the mixture solvent ( $\text{CD}_3\text{OD}:\text{DMSO-}d_6 = 5:1$ ): This reveals that the crystals are stable in  $\text{CD}_3\text{OD}$  however led to partially decomposition upon addition of DMSO.

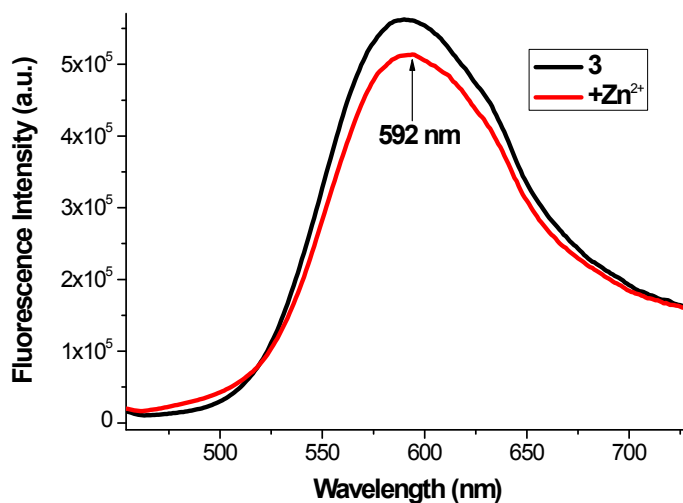

Figure S3a. Fluorescence spectra of **3** ( $10\ \mu\text{M}$ ) in HEPES buffer ( $10\ \text{mM}$ ,  $\text{pH} = 7.2$ ), followed by addition of  $2.0$  equiv. of  $\text{Zn}^{2+}$ . (It tells the weak binding between **3** and  $\text{Zn}^{2+}$  in HEPES buffer.)

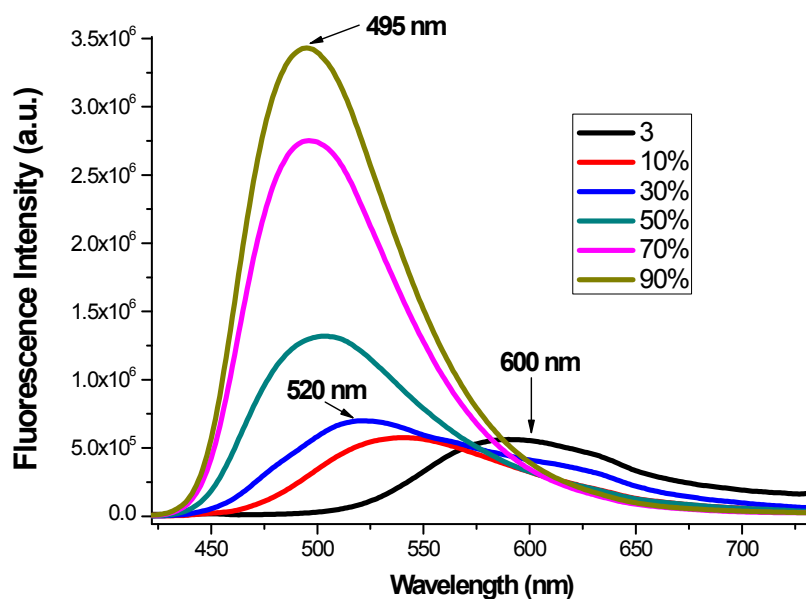

Figure S3b. Fluorescence spectra of **3** (10 μM) in HEPES buffer (10 mM, pH = 7.2) with different fractions of EtOH (% v/v), followed by addition of 2.0 equiv. of Zn<sup>2+</sup>. (It indicates that **3** binds Zn<sup>2+</sup> strongly in EtOH, however very weak in HEPES buffer.)

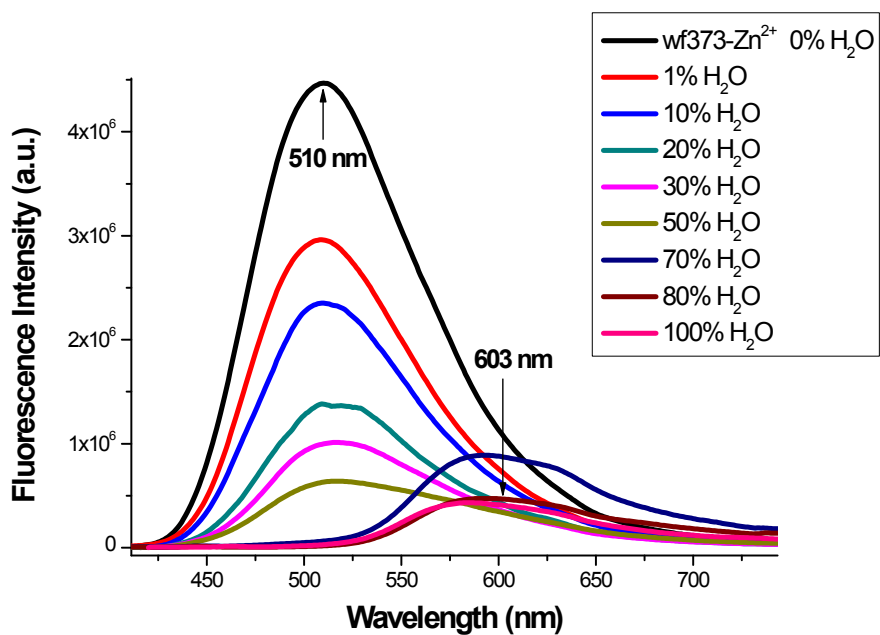

Figure 3c. Fluorescence spectra of [3-Zn<sup>2+</sup>] in the solvent of EtOH and H<sub>2</sub>O (%). (It tells that **3** binds Zn<sup>2+</sup> strongly in EtOH, however very weak in H<sub>2</sub>O)

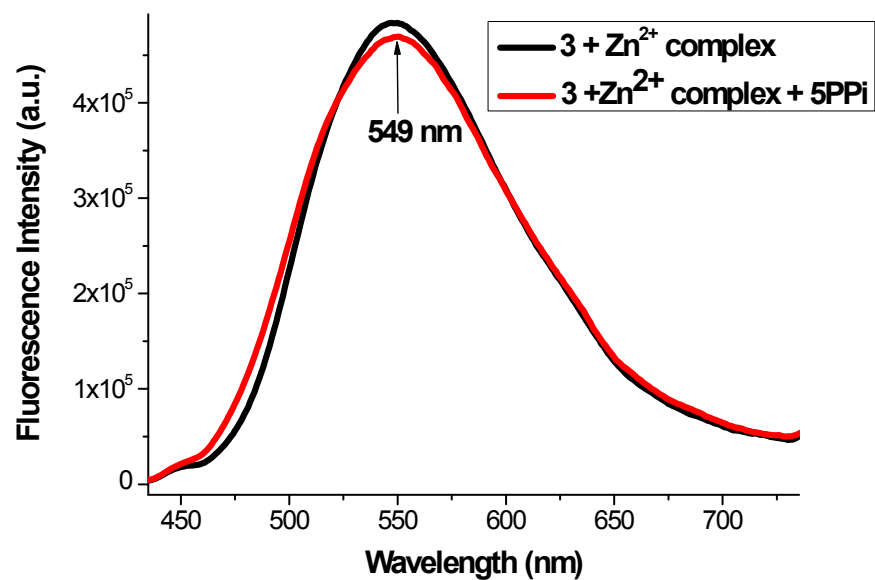

Figure S4. Fluorescence spectra of [**3** + **Zn**<sup>2+</sup>] complexes (10  $\mu$ M) in HEPES buffer (10  $\mu$ M, pH = 7.2) upon addition of 5.0 equiv. of PPI. It tells: a) zinc complexes decomposed in HEPES buffer; b) PPI did not response to [**3** + **Zn**<sup>2+</sup>] complexes in 100% buffer.

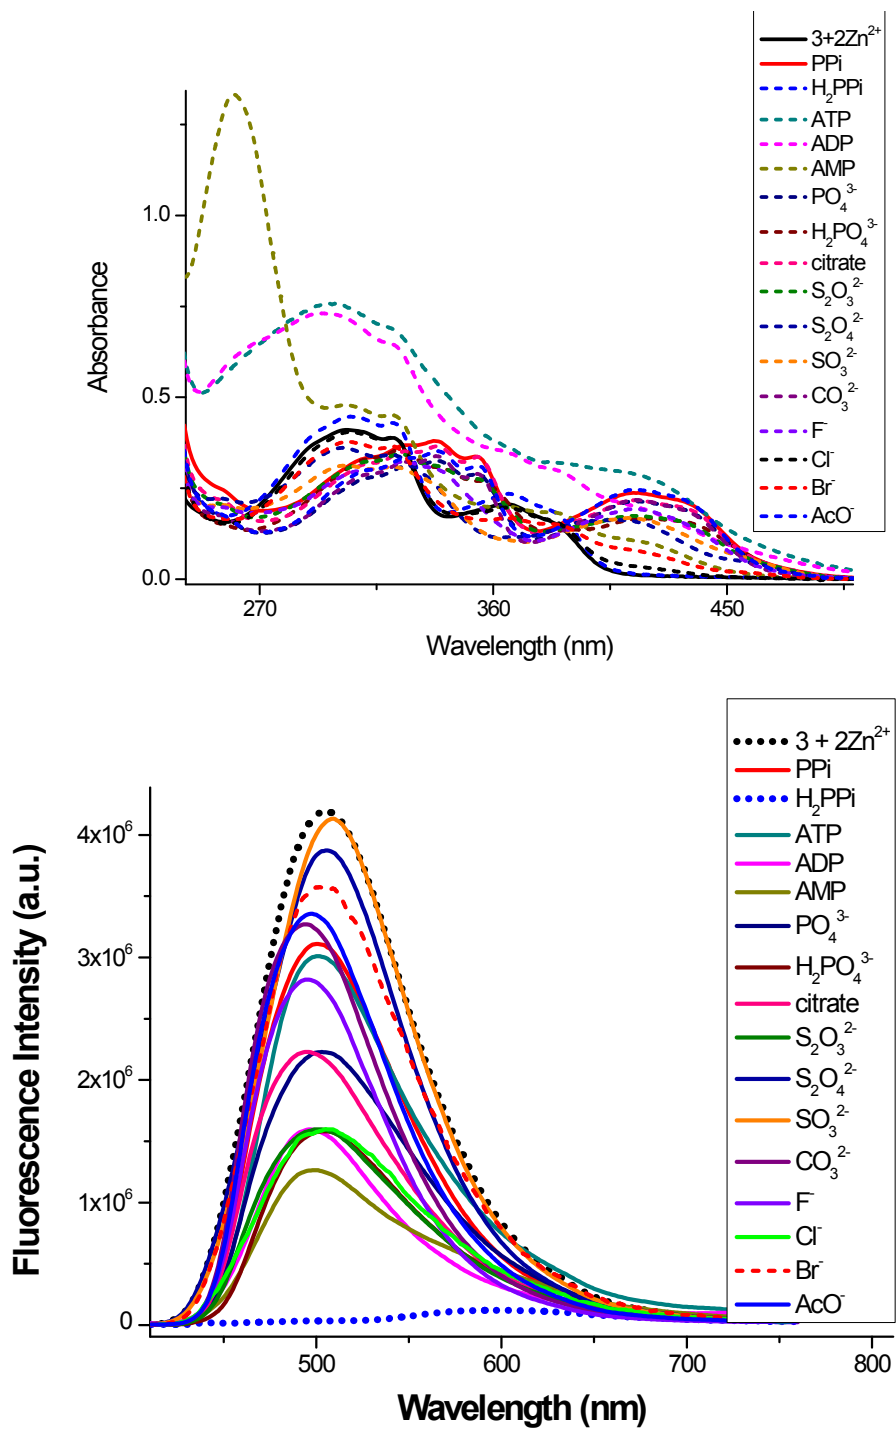

Figure S5. UV-vis (a) and fluorescence spectra (b) of  $3+Zn^{2+}$  complex (10  $\mu$ M) in EtOH upon addition of 5.0 equivalent of different anions.

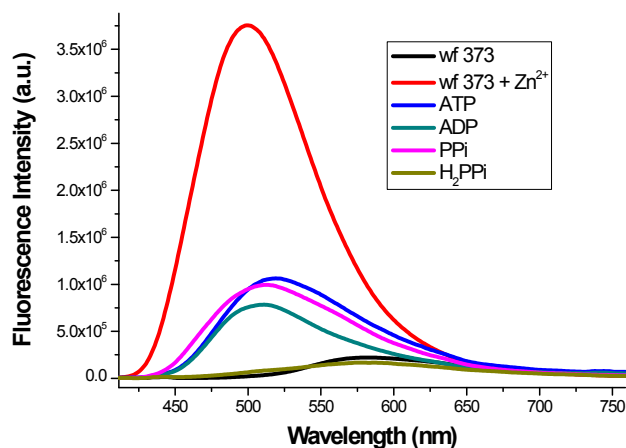

Figure S6. Fluorescence response of  $3+Zn^{2+}$  complex ( $10 \mu M$ ) in EtOH upon addition of 5.0 equivalent of different anions.

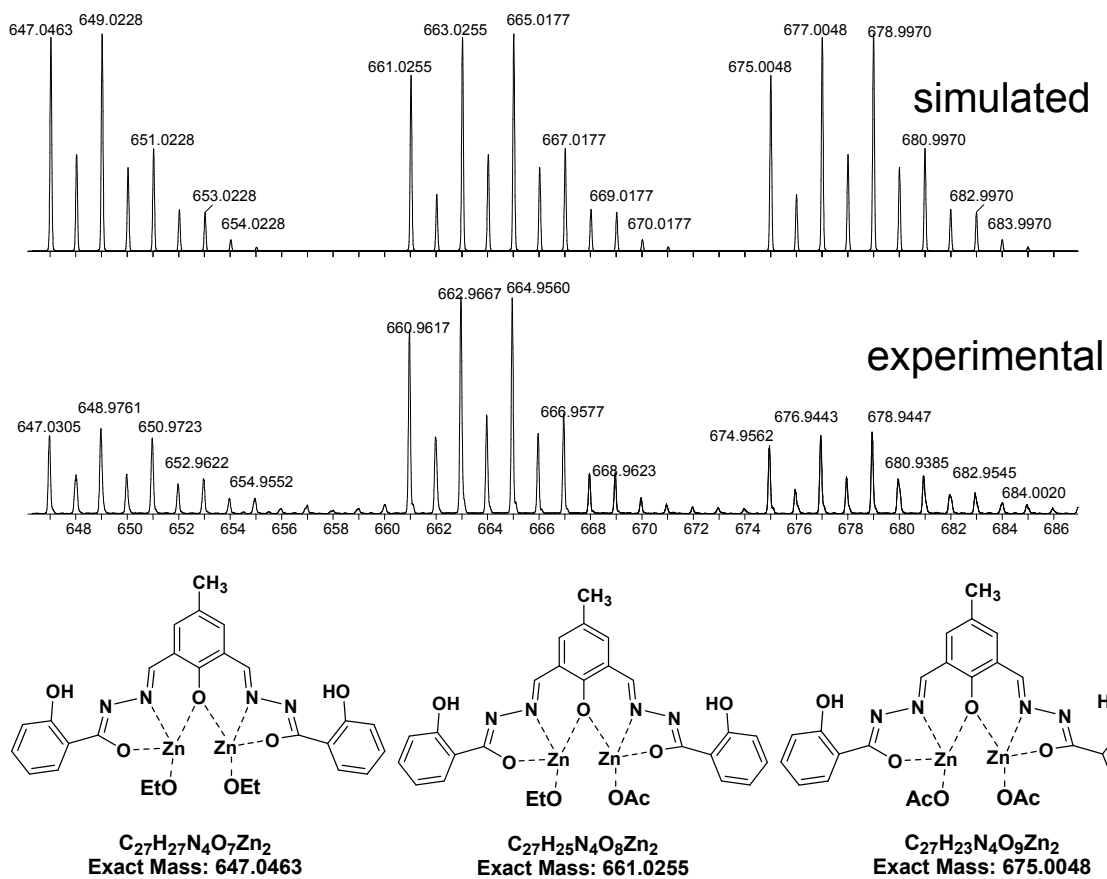

Figure S7. ESI Mass spectra of the zinc complexes of  $3-Zn^{2+}$

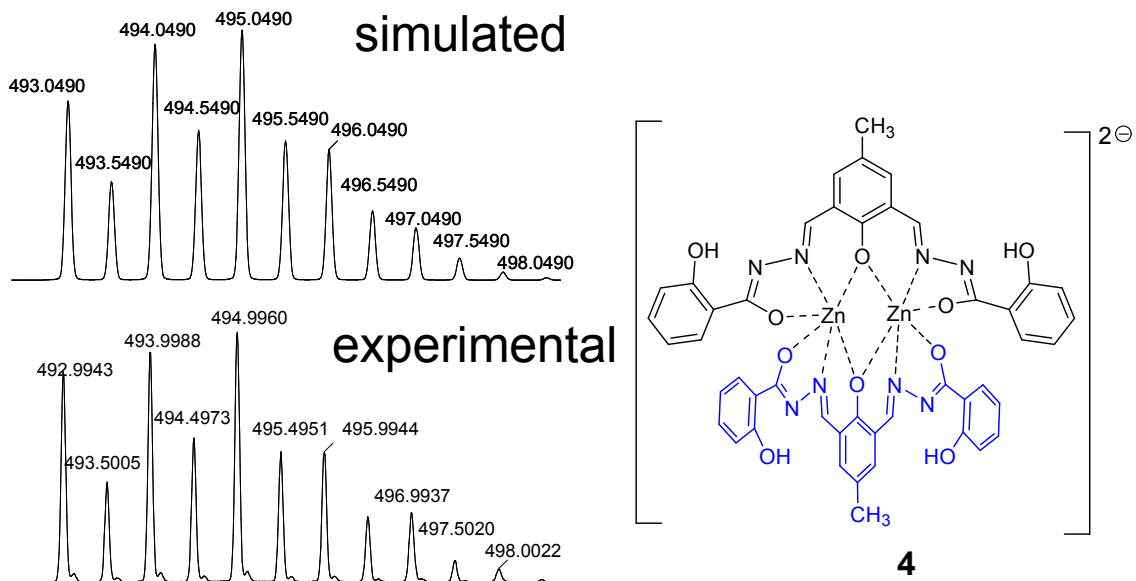

Figure S8. ESI Mass spectra of the dimer zinc complex **4**:  $3_2\text{Zn}_2$

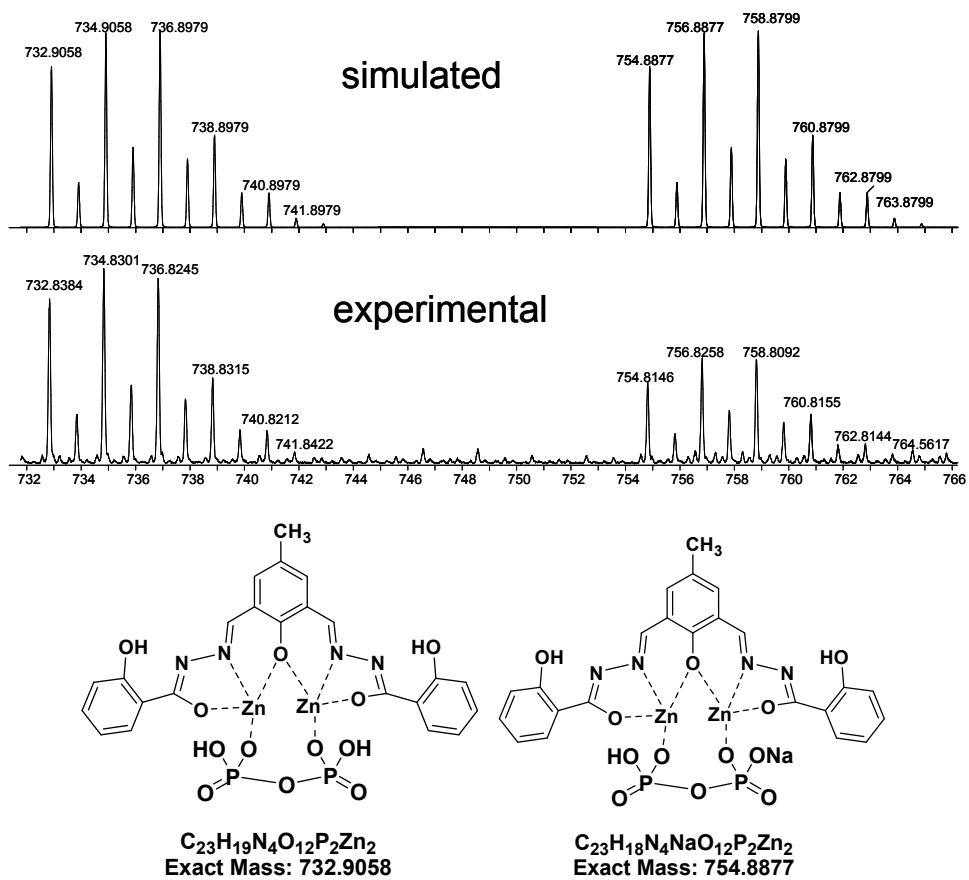

Figure S9. ESI Mass spectra of  $3\text{-Zn}^{2+}$ -PPi adducts



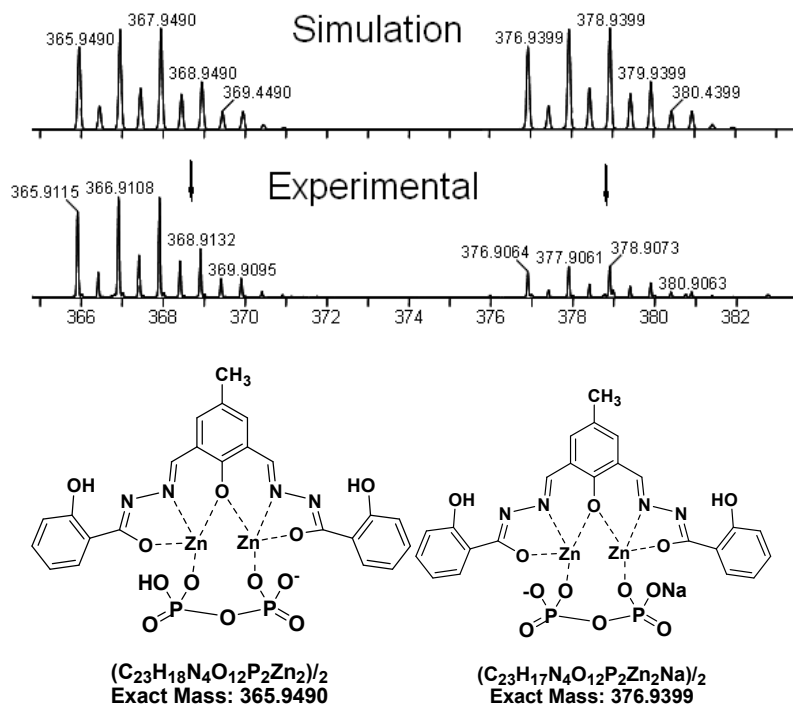

Figure S10. ESI Mass spectra of **3**-Zn<sup>2+</sup>-PPi adducts

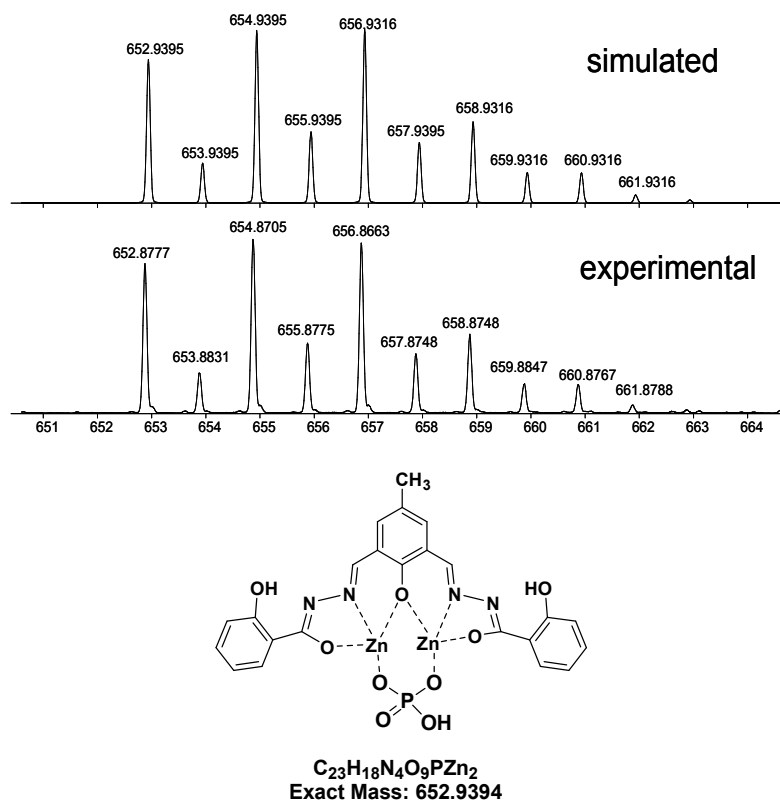

Figure S11. ESI Mass spectra of the key intermediate **8**

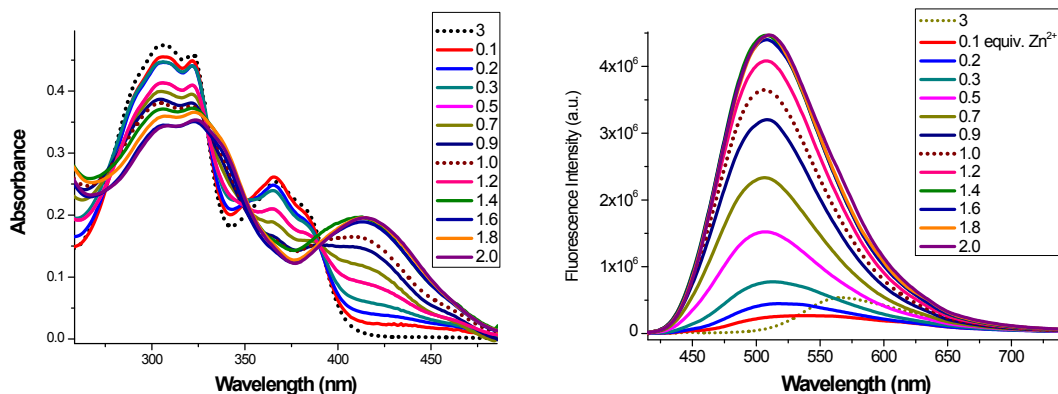

Figure S12a. UV-vis (a) and fluorescence spectra (b) of **3** (10  $\mu$ M) in EtOH upon addition of different equivalent of Zn(NO<sub>3</sub>)<sub>2</sub>. **3** (10 mM) was dissolved in DMSO as the stock solution and then diluted 1000 times into EtOH; Zn(NO<sub>3</sub>)<sub>2</sub> was dissolved in EtOH (1 mM) as the stock solution.

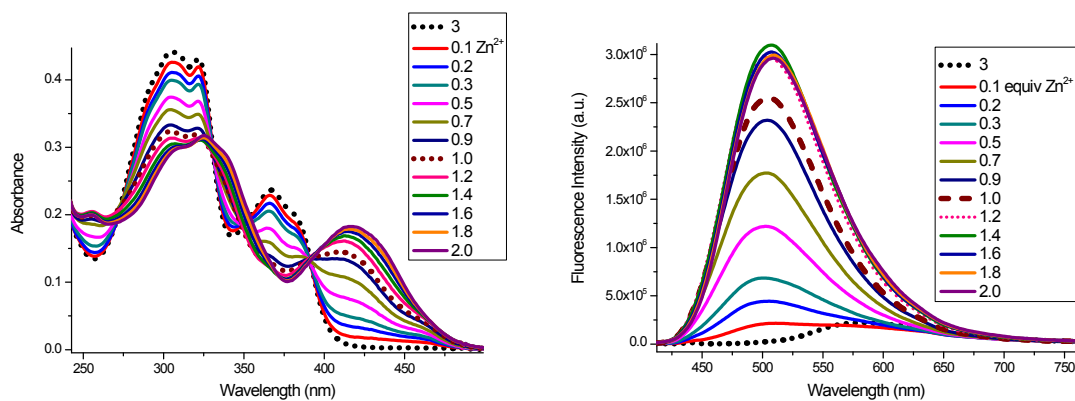

Figure S12b. UV-vis (a) and fluorescence spectra (b) of **3** (10  $\mu$ M) in EtOH upon addition of different equivalent of Zn(NO<sub>3</sub>)<sub>2</sub>. **3** (10 mM) was dissolved in DMSO as the stock solution and then diluted 1000 times into EtOH; Zn(NO<sub>3</sub>)<sub>2</sub> was dissolved in H<sub>2</sub>O (1 mM) as the stock solution (Very little water caused great fluorescence decrease).

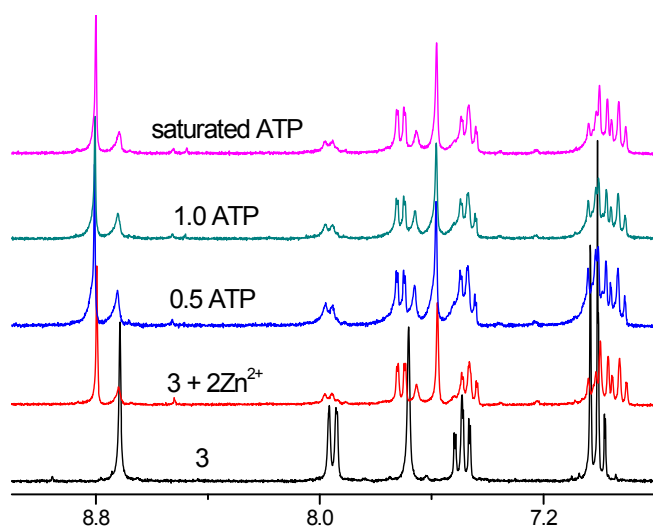

Figure S13.  $^1\text{H}$  NMR titration of  $[3 + 2\text{Zn}^{2+}]$  in  $\text{CD}_3\text{OD}$  with different equiv. of  $\text{H}_2\text{ATP}$

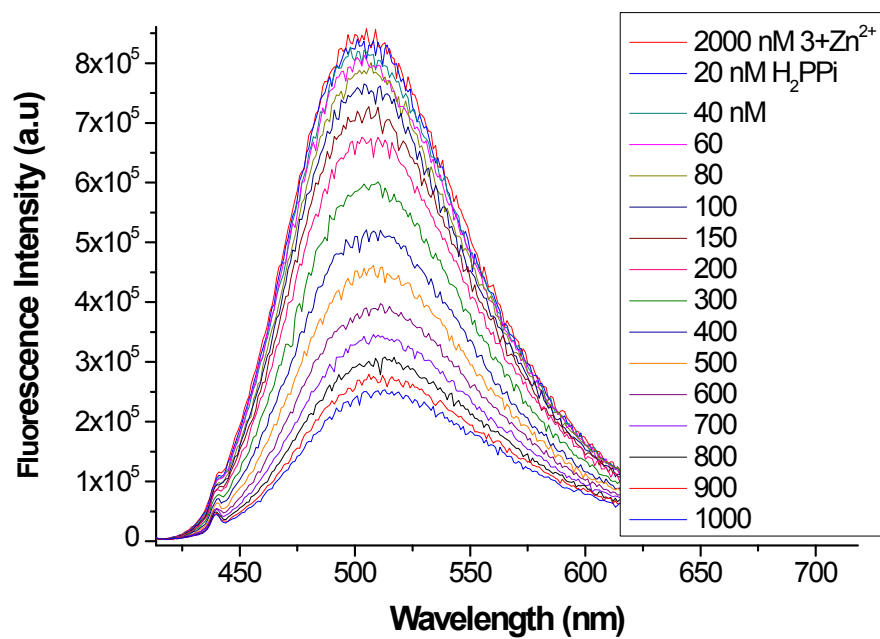

Fig S14. Emission of  $3\text{-Zn}^{2+}$  ( $2\ \mu\text{M}$ ) at different concentrations of  $\text{H}_2\text{PPi}$  (0-1000 nM) added in EtOH.

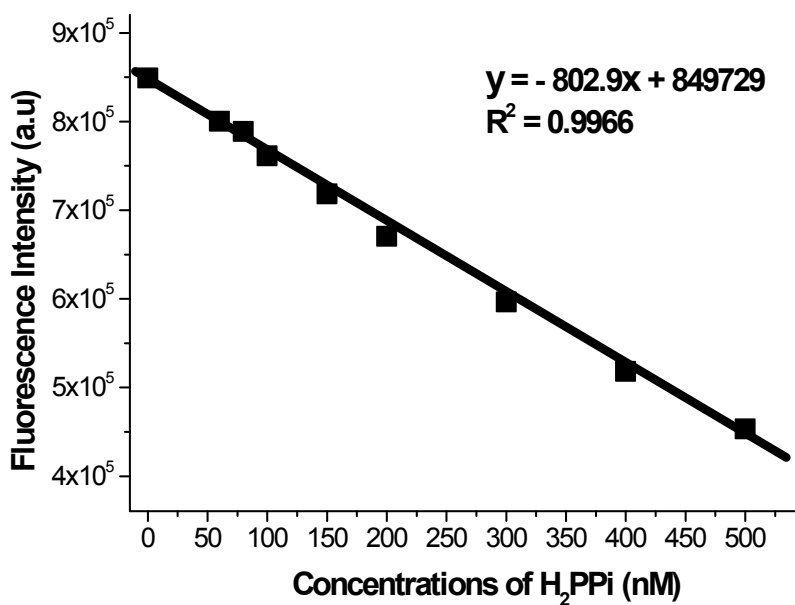

Fig S15. Emission of **3-Zn<sup>2+</sup>** (2  $\mu$ M) at different concentrations of H<sub>2</sub>PPI added in EtOH.

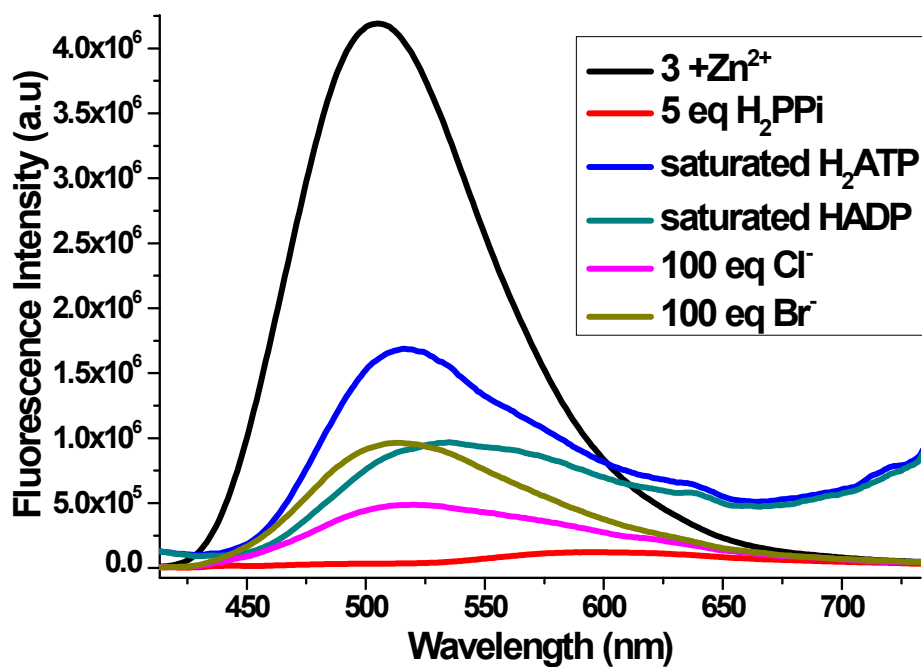

Figure S16. Fluorescence spectra of **3+Zn<sup>2+</sup>** complex (10  $\mu$ M) in EtOH upon addition of different anions. The large excess of H<sub>2</sub>ATP, HADP and halides were used to illustrate that the other anions are much less effective in interaction with the zinc complex.

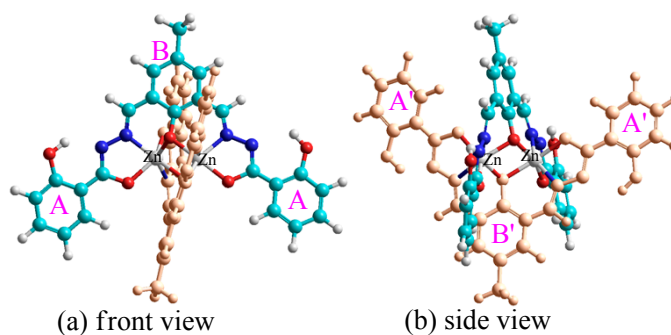

Figure S17. Geometry-optimized structure of zinc complex **4** by using HyperChem software (molecular mechanics force field MM+). The C, N, O and Zn atoms are in cyan, blue, red and grey colors, respectively. For clarity, one of the ligand is shown in orange color. The end and central phenyl rings are indicated by letters A and B, respectively.

**<sup>1</sup>HNMR of 3 in DMSO-D<sub>6</sub>:**

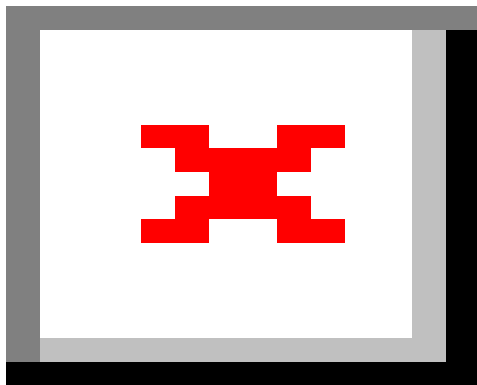

**<sup>1</sup>HNMR of 3 in CD<sub>3</sub>OD:**

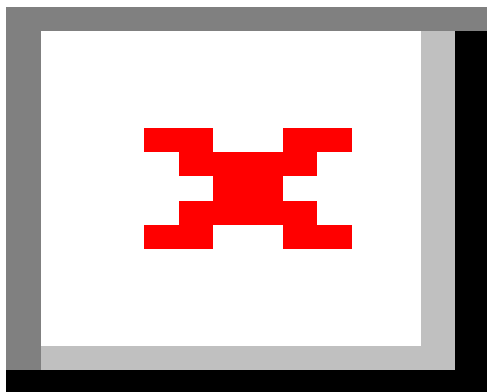

**$^{13}\text{C}$  NMR of 3 in DMSO- $\text{D}_6$ :**

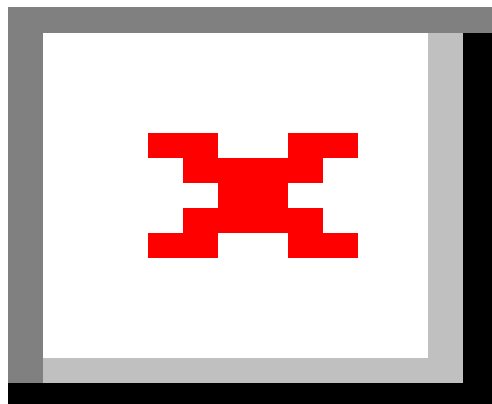

Supplement: c4dt01799d1.pdf [file c4dt01799d1.pdf]
